# Supplementary material for: Genome-Wide Identification and Expression Analysis of Polygalacturonase Gene Family in Kiwifruit (Actinidia chinensis) during Fruit Softening
Source: PubMed Central journal article supplement (PMC7154832; doi:10.3390/plants9030327), 2020-03-04
Supplement: plants-09-00327-s001.pdf [file plants-09-00327-s001.pdf]

Supplementary Material

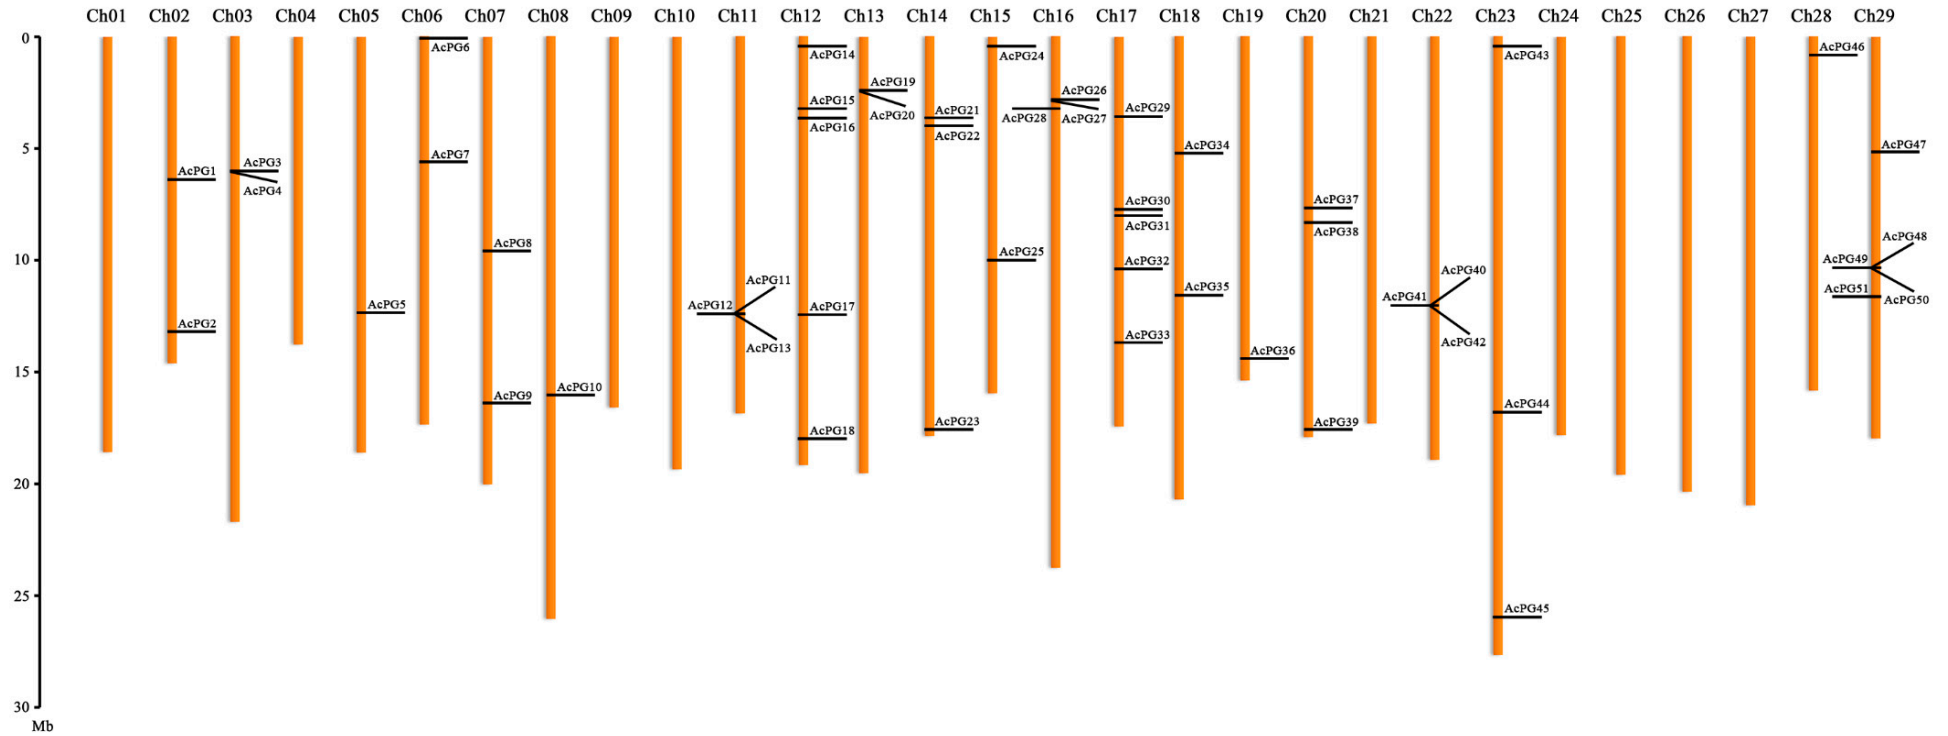

Figure S1. PG family in chr map.

**Table S1.** Motifs information identified by MEME from 51 PG proteins of kiwifruit.

| Motifs | Width | Best Possible Match                                | Pfam Annotation | PG Domains |
|--------|-------|----------------------------------------------------|-----------------|------------|
| Motif1 | 41    | APGDSPNTDGIHIDSSTNVVIEBSNIGTGDDCISIGSGWSN          | GH28            | I, II      |
| Motif2 | 34    | QGGGGYVRGITFQBITEMENVKNPIIIDQNYCDHP                | GH28            |            |
| Motif3 | 50    | LTGSFNLTSHMTLFLARDAVILGSQDEKEWPLIEPLPSYGRGRELPGGRY | No hit          |            |
| Motif4 | 18    | NITCGPGHGISIGSLGKS                                 | GH28            | III        |
| Motif5 | 21    | DFGAVGDGVTDNTKAFQSAWK                              | No hit          |            |
| Motif6 | 21    | NVTVENVTLTNTTNGVRIKTW                              | GH28            | IV         |
| Motif7 | 15    | GGGTIDGQGSKWWAK                                    | No hit          |            |
| Motif8 | 41    | KTRPTLLEFMNSSNIVVSGJTILNSPQFHIFVCGCKNVRVQ          | GH28            |            |

**Table S2.** Transcriptome FPKM results of 41 AcPG genes during kiwifruit 'Donghong' softening.

| Gene_id | W0       | W1       | W2       | W3       | W4       | W5       | W6       |
|---------|----------|----------|----------|----------|----------|----------|----------|
| AcPG1   | 0        | 0        | 0        | 0        | 0        | 0.005964 | 0.005943 |
| AcPG2   | 0        | 0.012157 | 0.088802 | 0.076917 | 0.060583 | 0.026955 | 0.031771 |
| AcPG3   | 0.005687 | 0        | 0        | 0        | 0        | 0        | 0        |
| AcPG4   | 40.17887 | 68.95563 | 323.5688 | 568.4539 | 1060.107 | 1208.523 | 283.9159 |
| AcPG6   | 0.082534 | 0.145185 | 0.145839 | 0.107986 | 0.098876 | 0.198089 | 0.242513 |
| AcPG7   | 0        | 0.039278 | 0        | 0.004945 | 0.025012 | 0.009907 | 0.012505 |
| AcPG8   | 0.201132 | 0.291321 | 0.726393 | 1.734398 | 1.705668 | 0.834505 | 1.090468 |
| AcPG9   | 0        | 0        | 0.010639 | 0.004889 | 0.059254 | 0.047787 | 0.123419 |
| AcPG10  | 0        | 0        | 0        | 0        | 0        | 0        | 0.003831 |
| AcPG11  | 4.933503 | 3.779318 | 3.154088 | 2.145332 | 2.07919  | 3.373734 | 4.744524 |
| AcPG12  | 0        | 0.009898 | 0        | 0.010018 | 0        | 0        | 0        |
| AcPG13  | 0        | 0.004515 | 0        | 0        | 0.109432 | 0.038187 | 0        |
| AcPG14  | 6.530088 | 4.199244 | 3.111557 | 5.219298 | 3.228238 | 2.248606 | 3.342678 |
| AcPG15  | 9.598302 | 7.620523 | 6.530044 | 6.941791 | 5.605419 | 4.120339 | 7.487684 |
| AcPG16  | 0        | 0        | 0        | 0        | 0.005174 | 0        | 0        |
| AcPG18  | 45.41771 | 177.34   | 1694.221 | 2717.512 | 2848.047 | 4475.037 | 2251.134 |
| AcPG19  | 0.024358 | 0.036823 | 0.150901 | 0.032678 | 0.02915  | 0.00727  | 0.00666  |
| AcPG20  | 0        | 0.004839 | 0        | 0        | 0        | 0        | 0        |
| AcPG21  | 2.808134 | 1.128272 | 0.218757 | 0.144839 | 0.239007 | 0.028834 | 0.024011 |
| AcPG22  | 0.237985 | 0.172001 | 0.169042 | 0.047623 | 0.052688 | 0.05837  | 0.076554 |
| AcPG24  | 12.10591 | 12.67585 | 8.925292 | 6.612047 | 7.782419 | 8.073493 | 12.41502 |

|        |          |          |          |          |          |          |          |
|--------|----------|----------|----------|----------|----------|----------|----------|
| AcPG25 | 0        | 0        | 0        | 0        | 0.032461 | 0.01487  | 0.014486 |
| AcPG26 | 0.473029 | 0.341556 | 0.037285 | 0.082194 | 0.097798 | 0.037354 | 0.097953 |
| AcPG27 | 0.061149 | 0.008108 | 0.012899 | 0.004371 | 0.007578 | 0.00413  | 0.062608 |
| AcPG28 | 1.805997 | 1.465551 | 1.05026  | 0.316238 | 0.499769 | 0.790778 | 1.370556 |
| AcPG30 | 0.004953 | 0.005266 | 0        | 0        | 0        | 0        | 0        |
| AcPG31 | 0.004896 | 0.009819 | 0.005126 | 0        | 0.022554 | 0        | 0.003748 |
| AcPG32 | 0.005551 | 0.005902 | 0.022848 | 0.022381 | 0.009524 | 0.02115  | 0        |
| AcPG33 | 1.46235  | 0.996372 | 0.617987 | 0.717085 | 0.896082 | 1.075926 | 0.618712 |
| AcPG34 | 0.100727 | 0.097711 | 0.066296 | 0.03595  | 0.087073 | 0.007938 | 0.039488 |
| AcPG35 | 0.004097 | 0        | 0.004215 | 0        | 0.052712 | 0.007853 | 0.033153 |
| AcPG36 | 0.019187 | 0.003711 | 0.004053 | 0        | 0.028141 | 0.028292 | 0.029292 |
| AcPG37 | 0.197905 | 0.143773 | 0.158067 | 0.118313 | 0.169947 | 0.004132 | 0.07585  |
| AcPG39 | 2.081924 | 1.747334 | 2.286361 | 2.454927 | 1.491299 | 2.452891 | 3.275163 |
| AcPG43 | 0.771587 | 0.582909 | 0.448327 | 0.35229  | 0.603861 | 0.483203 | 0.589446 |
| AcPG44 | 5.206603 | 5.472286 | 6.843636 | 5.95603  | 6.162002 | 6.376221 | 7.000991 |
| AcPG45 | 2.979494 | 2.546972 | 2.085045 | 1.895882 | 1.439254 | 1.885178 | 2.769173 |
| AcPG47 | 0        | 0.003983 | 0.012699 | 0.028314 | 0.056203 | 0.065316 | 0.024207 |
| AcPG48 | 1.387424 | 0.743037 | 0.163055 | 0.021072 | 0.648054 | 0.008883 | 0.052222 |
| AcPG49 | 0        | 0        | 0        | 0.00929  | 0.003953 | 0.016503 | 0.004691 |
| AcPG51 | 0.87742  | 0.842924 | 0.503413 | 0.089986 | 0.021981 | 0.024722 | 0.010626 |

Table S3. qPCR results of 26 AcPG genes during kiwifruit 'Donghong' softening.

| Gene_id | W0     | W1      | W2       | W3       | W4       | W5       | W6       |
|---------|--------|---------|----------|----------|----------|----------|----------|
| AcPG2   | 0.000  | 0.000   | 0.035    | 0.022    | 0.021    | 0.018    | 0.012    |
| AcPG4   | 53.948 | 225.184 | 2005.531 | 2801.123 | 3137.239 | 4107.495 | 1677.472 |
| AcPG6   | 0.021  | 0.015   | 0.012    | 0.016    | 0.010    | 0.018    | 0.025    |
| AcPG8   | 0.123  | 0.204   | 0.469    | 1.136    | 1.177    | 0.533    | 0.488    |
| AcPG9   | 0.000  | 0.000   | 0.007    | 0.013    | 0.025    | 0.026    | 0.018    |
| AcPG11  | 1.521  | 1.098   | 0.797    | 0.513    | 0.297    | 0.595    | 1.563    |
| AcPG13  | 0.027  | 0.000   | 0.004    | 0.000    | 0.117    | 0.003    | 0.006    |
| AcPG14  | 0.442  | 0.271   | 0.251    | 0.384    | 0.219    | 0.155    | 0.196    |
| AcPG15  | 0.828  | 0.572   | 0.523    | 0.616    | 0.447    | 0.319    | 0.541    |
| AcPG18  | 12.687 | 93.116  | 1156.853 | 1245.736 | 823.492  | 1363.581 | 633.394  |
| AcPG19  | 0.020  | 0.026   | 0.052    | 0.036    | 0.028    | 0.017    | 0.031    |
| AcPG21  | 0.703  | 0.455   | 0.074    | 0.032    | 0.046    | 0.017    | 0.008    |

|        |       |       |       |       |       |       |       |
|--------|-------|-------|-------|-------|-------|-------|-------|
| AcPG22 | 0.023 | 0.016 | 0.021 | 0.009 | 0.005 | 0.011 | 0.012 |
| AcPG24 | 5.288 | 5.883 | 3.491 | 2.198 | 2.355 | 2.851 | 5.266 |
| AcPG26 | 0.093 | 0.048 | 0.014 | 0.018 | 0.059 | 0.011 | 0.017 |
| AcPG28 | 0.291 | 0.162 | 0.128 | 0.079 | 0.068 | 0.136 | 0.287 |
| AcPG33 | 0.326 | 0.274 | 0.117 | 0.127 | 0.213 | 0.208 | 0.136 |
| AcPG34 | 0.015 | 0.014 | 0.017 | 0.008 | 0.007 | 0.005 | 0.007 |
| AcPG37 | 0.051 | 0.032 | 0.031 | 0.033 | 0.050 | 0.012 | 0.023 |
| AcPG39 | 0.590 | 0.493 | 0.427 | 0.524 | 0.234 | 0.446 | 0.850 |
| AcPG43 | 0.189 | 0.176 | 0.105 | 0.068 | 0.077 | 0.067 | 0.110 |
| AcPG44 | 0.879 | 0.997 | 1.163 | 1.030 | 0.710 | 0.718 | 0.960 |
| AcPG45 | 0.030 | 0.014 | 0.008 | 0.097 | 0.864 | 0.859 | 0.066 |
| AcPG47 | 0.000 | 0.000 | 0.069 | 0.085 | 0.339 | 0.222 | 0.066 |
| AcPG48 | 0.581 | 0.373 | 0.052 | 0.023 | 0.302 | 0.005 | 0.019 |
| AcPG51 | 0.303 | 0.369 | 0.268 | 0.048 | 0.003 | 0.011 | 0.009 |

Note: values are mean from three replicates, and standard errors are not shown.

**Table S4.** Correlation analysis of gene expression and enzyme activity of AcPGs during 'Donghong' softening.

| Gene Name | Pearson Coefficient |                             |
|-----------|---------------------|-----------------------------|
|           | qPCR and FPKM       | qPCR and PG Enzyme Activity |
| AcPG2     | 0.931               | 0.539                       |
| AcPG4     | 0.939               | 0.842                       |
| AcPG6     | 0.499               | -0.591                      |
| AcPG8     | 0.975               | 0.810                       |
| AcPG9     | 0.658               | 0.847                       |
| AcPG11    | 0.959               | -0.845                      |
| AcPG13    | 0.902               | 0.636                       |
| AcPG14    | 0.972               | -0.579                      |
| AcPG15    | 0.961               | -0.768                      |
| AcPG18    | 0.865               | 0.627                       |
| AcPG19    | 0.861               | -0.002                      |
| AcPG21    | 0.973               | -0.721                      |
| AcPG22    | 0.939               | -0.851                      |
| AcPG24    | 0.990               | -0.789                      |
| AcPG26    | 0.850               | -0.303                      |

|        |        |        |
|--------|--------|--------|
| AcPG28 | 0.869  | -0.748 |
| AcPG33 | 0.931  | -0.350 |
| AcPG34 | 0.714  | -0.648 |
| AcPG37 | 0.921  | -0.081 |
| AcPG39 | 0.835  | -0.642 |
| AcPG43 | 0.730  | -0.811 |
| AcPG44 | 0.180  | -0.548 |
| AcPG45 | -0.714 | 0.848  |
| AcPG47 | 0.911  | 0.958  |
| AcPG48 | 0.994  | -0.396 |
| AcPG51 | 0.976  | -0.722 |

Table S5. List of primers used for qPCR assay of AcPG genes.

| Gene Name | Gene Locus       | PCR Length | Sense Primer (5'-3')          | Anti-sense Primer (5'-3')   |
|-----------|------------------|------------|-------------------------------|-----------------------------|
| AcPG2     | CEY00_Acc02429.1 | 183        | TCCTAGTCAAACCCGTCTCATTCTC     | CCTGTCCATCAATAATACCGCTACC   |
| AcPG4     | CEY00_Acc03126.1 | 152        | GCACGCTACGATGGTCAATGTC        | CCGCAACTTCTGTCTGCTGATG      |
| AcPG6     | CEY00_Acc06176.1 | 116        | GTAGCACCAGATGAGCCGAATAAC      | CTTCCACAGCCATCAATAACTCCAC   |
| AcPG8     | CEY00_Acc08039.1 | 115        | GGATGTGGTGGGAGATGTGGTG        | GGAGAGTTACAGAAGGTGAGGTTGG   |
| AcPG9     | CEY00_Acc08167.1 | 102        | CCACGGTTTCTAAGGTCTTTGATACTC   | GTGTGACTATTCTGTGGAGTTGTTT   |
| AcPG11    | CEY00_Acc12552.1 | 156        | CAATATTACTGTGATGTCAGAGGTGGATG | CAACAATATATCGGTGCAGGCAACAG  |
| AcPG13    | CEY00_Acc12562.1 | 82         | TGGACGGACGAGGAAGAATTGATG      | CGACATGGCTTACTTGTGTTGACC    |
| AcPG14    | CEY00_Acc12941.1 | 121        | GTCTCGGCAATTTCCAAGCTGATG      | CGCCTTCAGTTAGGAACAGAGTCATG  |
| AcPG15    | CEY00_Acc13137.1 | 125        | AGAATGTGATGGTGGAGTTGGAATCG    | GGCTGGCTGAGTGAGGTTGAC       |
| AcPG18    | CEY00_Acc13940.1 | 176        | GCAACCACTGACTTCTTCTTCTCTC     | GCATAGCCGAACCGCAAGC         |
| AcPG19    | CEY00_Acc14204.1 | 101        | CTACCATCACCACTCCACTTCC        | GGCGGGCTGTTGTCTTTCTTTG      |
| AcPG21    | CEY00_Acc15593.1 | 190        | GGAGATGTGGAGGCGGAGAAC         | CGTATTGGGAGAGTCGGTTGGAG     |
| AcPG22    | CEY00_Acc15651.1 | 188        | AGGCCTTCAGGACGGCGATAAC        | GGGATCTACCACAGGCCATTCTGT    |
| AcPG24    | CEY00_Acc16389.1 | 161        | GCCGATGTGGTAACTTGCTCTG        | GTGCCGCCGCTACTCCTC          |
| AcPG26    | CEY00_Acc17817.1 | 132        | AGGCAACTCTTCGGTTATCCAGATC     | GACAGAATGGCTCCATCAACACTTATG |
| AcPG28    | CEY00_Acc17848.1 | 123        | GCCACCACCATCAGCTTTATG         | TCGACACTAAGCCCATCCACATCC    |
| AcPG33    | CEY00_Acc19726.1 | 125        | CCAGGTTGCTGTCCAGAATGTG        | GGTCGTCTCCAGTGCTAATGTAAC    |
| AcPG34    | CEY00_Acc20040.1 | 93         | GCCGAGGAAGGGACACGACTG         | TCGTGCCGTTGTCTGCTGTTAC      |
| AcPG37    | CEY00_Acc22880.1 | 182        | CCAGATTCGTGGTATGTATGC         | TACTGCCAAGAGCGAGAGC         |
| AcPG39    | CEY00_Acc23401.1 | 179        | ACAGGAACCTAACCTTCAACAATGTC    | GATTTCTACGCACCCGTGGATC      |
| AcPG43    | CEY00_Acc25490.1 | 106        | CCGCTCGTGAAGAGGCTAGTG         | AAGTCCTACTGTATTCGCATTGTCC   |

---

|         |                  |     |                           |                           |
|---------|------------------|-----|---------------------------|---------------------------|
| AcPG44  | CEY00_Acc22128.1 | 180 | GGGATTCGTGGTCATGGTGTTCG   | CTCACACGGAGTTGGGAAAATCC   |
| AcPG45  | CEY00_Acc26873.1 | 167 | CAATGATCCTCTCATCGCACCAAAC | CAGATTGAATGCCACCGATCTAAGC |
| AcPG47  | CEY00_Acc32814.1 | 99  | CCATCACCACCACCTCTAAAAGC   | GGAGGGTGGTTTGTGTCTTTC     |
| AcPG48  | CEY00_Acc33079.1 | 165 | GGATTGCCTATGACAGACCTACCG  | GGA ACTCAACACCGCAAAATGAG  |
| AcPG51  | CEY00_Acc33179.1 | 180 | ATGTGACAGCCCTGCCCTAATTC   | TCGATGTGAATCCCATCGGTATTG  |
| AcActin | CEY00_Acc08081.1 | 120 | GCAGGAATCCATGAGACTACC     | GTCTGCTATACCAGGGAACAT     |

---
